# Supplementary material
Source: MDPI journal article supplement (https://www.mdpi.com/2673-7426/2/3/30)
Supplement: s1 [file s1]

**Table S1.** Top 25 upregulated and top 25 downregulated genes in COAD.

| <i>Symbol</i> | <b>Entraze ID</b> | <b>P-value</b> | <b>Log2(fold change)</b> | <b>FDR</b> |
|---------------|-------------------|----------------|--------------------------|------------|
| CA1           | 759               | 7.23E-56       | -10.51                   | 9.89E-54   |
| OTOP2         | 92736             | 6.37E-131      | -9.48                    | 6.54E-127  |
| AQP8          | 343               | 1.73E-49       | -9.28                    | 1.55E-47   |
| ZG16          | 653808            | 1.77E-42       | -9.12                    | 8.04E-41   |
| CLCA4         | 22802             | 3.94E-42       | -9.05                    | 1.73E-40   |
| TMIGD1        | 388364            | 9.76E-70       | -8.95                    | 3.78E-67   |
| GUCA2B        | 2981              | 1.34E-81       | -8.8                     | 1.25E-78   |
| CA4           | 762               | 3.86E-46       | -8.72                    | 2.48E-44   |
| PYY           | 5697              | 5.85E-78       | -8.68                    | 4.29E-75   |
| MS4A12        | 54860             | 7.77E-45       | -8.52                    | 4.40E-43   |
| CD177         | 57126             | 6.82E-51       | -7.86                    | 6.83E-49   |
| CA7           | 766               | 1.83E-85       | -7.81                    | 1.97E-82   |
| GCG           | 2641              | 1.93E-64       | -7.57                    | 4.90E-62   |
| CLDN8         | 9073              | 6.80E-58       | -7.48                    | 1.07E-55   |
| GUCA2A        | 2980              | 5.19E-51       | -7.2                     | 5.27E-49   |
| BEST4         | 266675            | 5.87E-94       | -6.96                    | 1.10E-90   |
| CDKN2BAS      | 100048912         | 3.02E-68       | -6.67                    | 1.03E-65   |
| SCARA5        | 286133            | 8.51E-50       | -6.32                    | 7.97E-48   |
| SCGN          | 10590             | 4.18E-66       | -6.26                    | 1.24E-63   |
| SST           | 6750              | 1.47E-64       | -6.07                    | 3.77E-62   |
| CA2           | 760               | 3.18E-54       | -5.92                    | 3.91E-52   |
| ABCG2         | 9429              | 8.98E-63       | -5.43                    | 2.00E-60   |
| TMEM72        | 643236            | 3.43E-63       | -5.1                     | 7.73E-61   |
| OSTalpha      | 200931            | 2.80E-43       | -4.95                    | 1.38E-41   |
| MMP7          | 4316              | 2.71E-50       | 7.11                     | 2.61E-48   |
| CST1          | 1469              | 9.23E-49       | 6.86                     | 7.80E-47   |
| KRT80         | 144501            | 3.77E-112      | 6.71                     | 1.29E-108  |
| CDH3          | 1001              | 3.04E-131      | 6.55                     | 6.24E-127  |
| CLDN2         | 9075              | 1.94E-34       | 5.96                     | 4.42E-33   |
| FOXQ1         | 94234             | 5.68E-76       | 5.86                     | 3.43E-73   |
| ETV4          | 2118              | 2.54E-104      | 5.47                     | 7.46E-101  |
| KRT23         | 25984             | 1.59E-23       | 5.46                     | 1.50E-22   |
| KIAA1199      | 57214             | 2.09E-79       | 5.45                     | 1.65E-76   |
| C6orf223      | 221416            | 1.14E-74       | 5.31                     | 5.69E-72   |
| CA9           | 768               | 3.88E-28       | 5.28                     | 5.20E-27   |
| GRIN2D        | 2906              | 1.10E-66       | 4.78                     | 3.48E-64   |
| CLDN1         | 9076              | 1.99E-76       | 4.76                     | 1.24E-73   |
| PRSS22        | 64063             | 7.41E-69       | 4.59                     | 2.62E-66   |
| MMP3          | 4314              | 1.39E-22       | 4.49                     | 1.22E-21   |
| GYLTL1B       | 120071            | 8.09E-48       | 4.23                     | 6.29E-46   |
| TRIM29        | 23650             | 1.66E-40       | 4.15                     | 6.41E-39   |
| LY6G6D        | 58530             | 1.99E-10       | 4                        | 6.69E-10   |
| VWA2          | 340706            | 4.33E-45       | 3.92                     | 2.49E-43   |
| NKD1          | 85407             | 1.45E-23       | 3.91                     | 1.37E-22   |
| KLK10         | 5655              | 4.27E-19       | 3.89                     | 2.84E-18   |
| MMP11         | 4320              | 3.25E-37       | 3.73                     | 9.32E-36   |

|      |       |          |      |          |
|------|-------|----------|------|----------|
| NKD2 | 85409 | 1.30E-36 | 3.71 | 3.55E-35 |
| TESC | 54997 | 6.37E-29 | 3.69 | 9.09E-28 |
| MMP1 | 4312  | 7.16E-19 | 3.64 | 4.67E-18 |

**Table S2.** Top Molecular and Cellular Functions generated using IPA based on the top 25 upregulated and downregulated genes in COAD.

| Name                            | p-value range       | # Molecules |
|---------------------------------|---------------------|-------------|
| Cellular Movement               | 8.02E-03 - 3.35E-06 | 24          |
| Molecular Transport             | 8.25E-03 - 5.44E-06 | 20          |
| Protein Synthesis               | 6.02E-03 - 2.09E-07 | 9           |
| Protein Degradation             | 6.02E-03 - 2.09E-07 | 8           |
| Post-Translational Modification | 2.50E-03 - 2.09E-07 | 5           |

**Table S3.** Main biomarkers application and target drugs, downloaded from IPA.

| Symbol   | Entrez Gene Name                                               | Location            | Type(s)       | Biomarker Application(s)          | Drug(s)                                                                                                                                                                                                                                                                                                                |
|----------|----------------------------------------------------------------|---------------------|---------------|-----------------------------------|------------------------------------------------------------------------------------------------------------------------------------------------------------------------------------------------------------------------------------------------------------------------------------------------------------------------|
| ABCG2    | ATP binding cassette subfamily G member 2 (Junior blood group) | Plasma Membrane     | transporter   | efficacy,prognosis                |                                                                                                                                                                                                                                                                                                                        |
| AQP8     | aquaporin 8                                                    | Plasma Membrane     | transporter   |                                   |                                                                                                                                                                                                                                                                                                                        |
| BEST4    | bestrophin 4                                                   | Plasma Membrane     | other         |                                   |                                                                                                                                                                                                                                                                                                                        |
| BMP3     | bone morphogenetic protein 3                                   | Extracellular Space | growth factor | diagnosis                         |                                                                                                                                                                                                                                                                                                                        |
| C6orf223 | chromosome 6 open reading frame 223                            | Other               | other         |                                   |                                                                                                                                                                                                                                                                                                                        |
| CA2      | carbonic anhydrase 2                                           | Cytoplasm           | enzyme        | diagnosis,unspecified application | acetazolamide,benzthiazide,brimonidine/brinzolamide,brinzolamide,chlorothiazide,chlorothiazide/reserpine,chlorthalidone,diazoxide,dichlorophenamide,dorzolamide,dorzolamide/timolol,ethoxylzolamide,hydrochlorothiazide,methazolamide,phentermine/topiramate,quinethazone,sulfacetamide,topiramate,trichloromethiazide |
| CA4      | carbonic anhydrase 4                                           | Plasma Membrane     | enzyme        |                                   | acetazolamide,benzthiazide,chlorothiazide,chlorothiazide/reserpine,chlorthalidone,dichlorphenamide,ethoxylzolamide,hydrochlorothiazide,methazolamide,phentermine/topiramate,sulfacetamide,topiramate,trichloromethiazide                                                                                               |
| CA7      | carbonic anhydrase 7                                           | Cytoplasm           | enzyme        |                                   | acetazolamide,benzthiazide,chlorothiazide,chlorthalidone,dichlorphenamide,ethoxylzolamide,hydrochlorothiazide,methazolamide,sulfacetamide,topiramate,trichloromethiazide                                                                                                                                               |

|            |                                                    |                     |                         |                                                      |                                                                                                                                                                                                                                                                                                                                                                                                                                                        |
|------------|----------------------------------------------------|---------------------|-------------------------|------------------------------------------------------|--------------------------------------------------------------------------------------------------------------------------------------------------------------------------------------------------------------------------------------------------------------------------------------------------------------------------------------------------------------------------------------------------------------------------------------------------------|
| CA9        | carbonic anhydrase 9                               | Nucleus             | enzyme                  | diagnosis,efficacy,prognosis,unspecified application | acetazolamide,benzthiazide,chlorothiazide,chlorthalidone,DTP348,girentuximab,hydrochlorothiazide,I 131 chimeric G250,iodine I-124 girentuximab,lutetium Lu-177 girentuximab,methazolamide,SLC-0111,sulfacetamide,topiramate,trichloromethiazide,Y 90 chimeric G250                                                                                                                                                                                     |
| CD177      | CD177 molecule                                     | Cytoplasm           | other                   |                                                      |                                                                                                                                                                                                                                                                                                                                                                                                                                                        |
| CDH3       | cadherin 3                                         | Plasma Membrane     | other                   | diagnosis,efficacy,prognosis                         | FF21101, PCA062,PF-06671008,PF-3732010                                                                                                                                                                                                                                                                                                                                                                                                                 |
| CDKN2B-AS1 | CDKN2B antisense RNA 1                             | Other               | other                   |                                                      |                                                                                                                                                                                                                                                                                                                                                                                                                                                        |
| CEMIP      | cell migration inducing hyaluronidase 1            | Cytoplasm           | enzyme                  |                                                      |                                                                                                                                                                                                                                                                                                                                                                                                                                                        |
| CLCA4      | chloride channel accessory 4                       | Plasma Membrane     |                         | ion channel                                          |                                                                                                                                                                                                                                                                                                                                                                                                                                                        |
| CLDN1      | claudin 1                                          | Plasma Membrane     | other                   | prognosis                                            |                                                                                                                                                                                                                                                                                                                                                                                                                                                        |
| CLDN2      | claudin 2                                          | Plasma Membrane     | other                   | unspecified application                              |                                                                                                                                                                                                                                                                                                                                                                                                                                                        |
| CLDN8      | claudin 8                                          | Plasma Membrane     | other                   |                                                      |                                                                                                                                                                                                                                                                                                                                                                                                                                                        |
| CST1       | cystatin SN                                        | Extracellular Space | other                   |                                                      |                                                                                                                                                                                                                                                                                                                                                                                                                                                        |
| ETV4       | ETS variant transcription factor 4                 | Nucleus             | transcription regulator | unspecified application                              |                                                                                                                                                                                                                                                                                                                                                                                                                                                        |
| FOXQ1      | forkhead box Q1                                    | Nucleus             |                         | transcription regulator                              |                                                                                                                                                                                                                                                                                                                                                                                                                                                        |
| GCG        | Glucagon                                           | Plasma Membrane     | other                   | efficacy                                             | ZP7570                                                                                                                                                                                                                                                                                                                                                                                                                                                 |
| GRIN2D     | glutamate ionotropic receptor NMDA type subunit 2D | Plasma Membrane     |                         | ion channel                                          | 1-aminocyclopropane-1-carboxylic acid,aspirin/cafeine/orphenadrine,b esonprodil,bicifadine,brompheniramine/dextromethorphan/pseudoephedrine,carbinoxamine/dextromethorphan/pseudoephedrine,chlorpheniramine/dextromethorphan/phenylephrine,cycloserine,delucemine,dextromethorphan,dextromethorphan/morphine,dextromethorphan/promethazine,dextromethorphan/quinidine,fe lbamate,N-(2-indanyl)glycinamide,nebostinel,neramexane,orphenadrine,UK-240455 |
| GUCA2A     | guanylate cyclase activator 2A                     | Extracellular Space | other                   |                                                      |                                                                                                                                                                                                                                                                                                                                                                                                                                                        |
| GUCA2B     | guanylate cyclase activator 2B                     | Extracellular Space | other                   |                                                      |                                                                                                                                                                                                                                                                                                                                                                                                                                                        |
| KLK10      | kallikrein related peptidase 10                    | Extracellular Space | peptidase               | diagnosis,prognosis,response to therapy              |                                                                                                                                                                                                                                                                                                                                                                                                                                                        |
| KRT23      | keratin 23                                         | Cytoplasm           | other                   |                                                      |                                                                                                                                                                                                                                                                                                                                                                                                                                                        |
| KRT80      | keratin 80                                         | Cytoplasm           | other                   |                                                      |                                                                                                                                                                                                                                                                                                                                                                                                                                                        |

|        |                                                      |                     |                         |                                                       |                         |
|--------|------------------------------------------------------|---------------------|-------------------------|-------------------------------------------------------|-------------------------|
| LARGE2 | LARGE xylosyl- and glucuronyltransferase 2           | Cytoplasm           | enzyme                  |                                                       |                         |
| LY6G6D | lymphocyte antigen 6 family member G6D               | Extracellular Space | other                   |                                                       |                         |
| MMP1   | matrix metalloproteinase 1                           | Extracellular Space | peptidase               | diagnosis,efficacy,safety                             | marimastat,rebimastat   |
| MMP11  | matrix metalloproteinase 11                          | Extracellular Space | peptidase               | diagnosis,disease progression,unspecified application | marimastat              |
| MMP3   | matrix metalloproteinase 3                           | Extracellular Space | peptidase               | diagnosis,efficacy                                    | marimastat              |
| MMP7   | matrix metalloproteinase 7                           | Extracellular Space | peptidase               | diagnosis                                             | marimastat              |
| MS4A12 | membrane spanning 4-domains A12                      | Plasma Membrane     | other                   |                                                       |                         |
| NKD1   | NKD inhibitor of WNT signaling pathway 1             | Other               | other                   |                                                       |                         |
| NKD2   | NKD inhibitor of WNT signaling pathway 2             | Nucleus             | other                   |                                                       |                         |
| OTOP2  | otopetrin 2                                          | Other               |                         | ion channel                                           |                         |
| PRSS22 | serine protease 22                                   | Extracellular Space | peptidase               |                                                       |                         |
| PYY    | peptide YY                                           | Extracellular Space | other                   | efficacy                                              |                         |
| SCARA5 | scavenger receptor class A member 5                  | Plasma Membrane     |                         | transmembrane receptor                                |                         |
| SCGN   | secretagogin, EF-hand calcium binding protein        | Cytoplasm           | other                   |                                                       |                         |
| SST    | Somatostatin                                         | Extracellular Space | other                   | efficacy                                              | somatostatin antagonist |
| TESC   | Tescalcin                                            | Cytoplasm           | other                   |                                                       |                         |
| TMEM72 | transmembrane protein 72                             | Other               | other                   |                                                       |                         |
| TMIGD1 | transmembrane and immunoglobulin domain containing 1 | Other               | other                   |                                                       |                         |
| TRIM29 | tripartite motif containing 29                       | Cytoplasm           | transcription regulator | diagnosis                                             |                         |
| VWA2   | von Willebrand factor A domain containing 2          | Extracellular Space | other                   | diagnosis                                             |                         |
| ZG16   | zymogen granule protein 16                           | Extracellular Space | other                   |                                                       |                         |
